# Supplementary material for: Subpopulations of Circulating Cells with Morphological Features of Malignancy Are Preoperatively Detected and Have Differential Prognostic Significance in Non-Small Cell Lung Cancer
Source: MDPI journal article supplement (doi:10.3390/cancers13174488), 2021-09-06
Supplement: s1 [file s1]

## ONLINE SUPPLEMENT

### **Subpopulations Of Circulating Cells With Morphological Features Of Malignancy Are Preoperatively Detected And Have Differential Prognostic Significance In Non-Small Cell Lung Cancer**

Emanuela Fina, Davide Federico, Pierluigi Novellis, Elisa Dieci, Simona Monterisi, Federica Cioffi, Giuseppe Mangiameli, Giovanna Finocchiaro, Marco Alloisio, Giulia Veronesi

#### *Index*

|                                                                                                                                                                                    |          |
|------------------------------------------------------------------------------------------------------------------------------------------------------------------------------------|----------|
| <b>Supplementary Tables .....</b>                                                                                                                                                  | <b>2</b> |
| Supplementary Table 1. Single circulating tumor cell (sCTC) prevalence and non-small cell lung cancer (NSCLC) patients' characteristics .....                                      | 2        |
| Supplementary Table 2. Circulating tumor cell cluster (cCTC) status and NSCLC patients' characteristics .....                                                                      | 4        |
| Supplementary Table 3. Recurrence-free survival probability in patients with operable stage I-II NSCLC according to standard clinico--pathological parameters and CTC status.....  | 6        |
| Supplementary Table 4. Recurrence-free survival probability in patients with operable stage III-IV NSCLC according to standard clinico-pathological parameters and CTC status..... | 7        |
| <b>Supplementary Figures .....</b>                                                                                                                                                 | <b>8</b> |
| Supplementary Figure 1. Naked nuclei detected in the blood of lung cancer-free individuals. ....                                                                                   | 8        |
| Supplementary Figure 2. Naked nuclei detected in the blood of non-small cell lung cancer patients .....                                                                            | 9        |

**Supplementary Table S1. Single circulating tumor cell (sCTC) prevalence and non-small cell lung cancer (NSCLC) patients' characteristics**

|                             | N (%)     | N sCTC≥1 (%) | N sCTC≥2 (%) | N sCTC≥3 (%) | N sCTC≥5 (%) |
|-----------------------------|-----------|--------------|--------------|--------------|--------------|
| All cases                   | 74 (100)  | 34 (45.9)    | 15 (20.3)    | 9 (12.2)     | 4 (5.4)      |
| <b>Sex</b>                  |           |              |              |              |              |
| Female                      | 33 (44.6) | 13 (39.4)    | 2 (6.1)      | 2 (6.1)      | 1 (3.0)      |
| Male                        | 41 (55.4) | 21 (51.2)    | 13 (31.7)    | 7 (17.1)     | 3 (7.3)      |
| <i>p-value</i>              |           | .3542        | .0081        | .2831        | .6237        |
| <b>Smoking habits</b>       |           |              |              |              |              |
| Current smoker              | 25 (33.8) | 12 (48.0)    | 7 (28.0)     | 4 (16.0)     | 1 (4.0)      |
| Former smoker               | 32 (43.2) | 16 (50.0)    | 8 (25.0)     | 5 (15.6)     | 3 (9.4)      |
| Never-smoker                | 16 (21.6) | 6 (37.5)     | 0            | 0            | 0            |
| Missing                     | 1 (1.4)   | 0            | 0            | 0            | 0            |
| <i>p-value<sup>a</sup></i>  |           | .5719        | .0308        | .1915        | .5699        |
| <b>Tumor stage</b>          |           |              |              |              |              |
| IA                          | 27 (36.5) | 12 (44.4)    | 4 (14.8)     | 3 (11.1)     | 1 (3.7)      |
| IB                          | 5 (6.8)   | 1 (20.0)     | 0            | 0            | 0            |
| IIA                         | 4 (5.4)   | 4 (100)      | 2 (50.0)     | 2 (50.0)     | 0            |
| IIB                         | 16 (21.6) | 7 (43.8)     | 3 (18.8)     | 1 (6.3)      | 0            |
| IIIA                        | 11 (14.9) | 6 (54.5)     | 4 (36.4)     | 1 (9.1)      | 1 (9.1)      |
| IIIB                        | 6 (8.1)   | 2 (33.3)     | 1 (16.7)     | 1 (16.7)     | 1 (16.7)     |
| IIIC                        | 0         | 0            | 0            | 0            | 0            |
| IVA                         | 5 (6.8)   | 2 (40.0)     | 1 (20.0)     | 1 (20.0)     | 1 (20.0)     |
| <i>p-value<sup>b</sup></i>  |           | >.9999       | .3551        | >.9999       | .0760        |
| <b>Histological subtype</b> |           |              |              |              |              |
| Adenocarcinoma              | 55 (74.3) | 25 (45.5)    | 10 (18.2)    | 5 (9.1)      | 3 (5.5)      |
| Squamous cell carcinoma     | 16 (21.6) | 8 (50.0)     | 5 (31.3)     | 4 (25.0)     | 1 (6.3)      |
| Other                       | 2 (2.7)   | 1 (50.0)     | 0            | 0            | 0            |
| Missing                     | 1 (1.4)   | 0            | 0            | 0            | 0            |
| <i>p-value<sup>c</sup></i>  |           | .7825        | .3030        | .1081        | >.9999       |
| <b>Grading</b>              |           |              |              |              |              |
| G1                          | 4 (5.4)   | 2 (50.0)     | 0            | 0            | 0            |
| G2                          | 44 (59.5) | 17 (38.6)    | 7 (15.9)     | 4 (9.1)      | 2 (4.5)      |
| G3                          | 24 (32.4) | 14 (58.3)    | 8 (33.3)     | 5 (20.8)     | 2 (8.3)      |
| G4                          | 0         | 0            | 0            | 0            | 0            |
| Missing                     | 2 (2.7)   | 1 (50.0)     | 0            | 0            | 0            |
| <i>p-value<sup>d</sup></i>  |           | .1435        | .1212        | .1492        | .5965        |

<sup>a</sup> current/former versus never-smokers

<sup>b</sup> stage I/II versus III/IV

<sup>c</sup> adenocarcinoma versus squamous cell carcinoma

<sup>d</sup> G1/G2 versus G3/G4

**Supplementary Table S1. Single circulating tumor cell (sCTC) prevalence and non-small cell lung cancer (NSCLC) patients' characteristics (*continued*)**

|                                             | N (%)     | N sCTC≥1 (%) | N sCTC≥2 (%) | N sCTC≥3 (%) | N sCTC≥5 (%) |
|---------------------------------------------|-----------|--------------|--------------|--------------|--------------|
| <b>Visceral pleura invasion</b>             |           |              |              |              |              |
| PL0                                         | 56 (75.7) | 26 (46.4)    | 13 (23.2)    | 8 (14.3)     | 3 (5.4)      |
| PL1                                         | 8 (10.8)  | 5 (62.5)     | 1 (12.5)     | 1 (12.5)     | 1 (12.5)     |
| PL2                                         | 5 (6.8)   | 1 (20.0)     | 0            | 0            | 0            |
| PL3                                         | 2 (2.7)   | 1 (50.0)     | 1 (50.0)     | 0            | 0            |
| Missing                                     | 3 (4.1)   | 1 (33.3)     | 0            | 0            | 0            |
| <i>p-value</i> <sup>e</sup>                 |           | >.9999       | >.5001       | .6730        | >.9999       |
| <b>Peritumoral neoplastic angioinvasion</b> |           |              |              |              |              |
| Absent                                      | 66 (89.2) | 32 (48.5)    | 14 (21.2)    | 9 (13.6)     | 4 (6.1)      |
| Present                                     | 6 (8.1)   | 1 (16.7)     | 1 (16.7)     | 0            | 0            |
| Missing                                     | 2 (2.7)   | 1 (50.0)     | 0            | 0            | 0            |
| <i>p-value</i>                              |           | .2088        | >.9999       | >.9999       | >.9999       |
| <b>Lymph-node status</b>                    |           |              |              |              |              |
| Negative                                    | 48 (64.9) | 22 (45.8)    | 10 (20.8)    | 6 (12.5)     | 2 (4.2)      |
| Positive                                    | 25 (33.8) | 11 (44.0)    | 5 (20.0)     | 3 (12.0)     | 2 (8.0)      |
| Missing                                     | 1 (1.4)   | 0            | 0            | 0            | 0            |
| <i>p-value</i>                              |           | >.9999       | >.9999       | >.9999       | .6027        |

<sup>e</sup> PL0 vs PL1/PL2/PL3

Abbreviations: hetCLU, heterotypic cluster; homCLU, homotypic CTC cluster

**Supplementary Table S2. Circulating tumor cell cluster (cCTC) status and NSCLC patients' characteristics**

|                         | N (%)     | N cCTC+ve (%) | N hetCLU+ve (%) | N homCLU+ve (%) |
|-------------------------|-----------|---------------|-----------------|-----------------|
| All cases               | 74 (100)  | 24 (32.4)     | 23 (31.1)       | 2 (2.7)         |
| <b>Sex</b>              |           |               |                 |                 |
| Female                  | 33 (44.6) | 10 (30.3)     | 10 (30.3)       | 0               |
| Male                    | 41 (55.4) | 14 (34.1)     | 13 (31.7)       | 2 (4.9)         |
| <i>p-value</i>          |           | .8055         | >.9999          | .4991           |
| <b>Smoking habits</b>   |           |               |                 |                 |
| Current smoker          | 25 (33.8) | 12 (48.0)     | 11 (44.0)       | 1 (4.0)         |
| Former smoker           | 32 (43.2) | 8 (25.0)      | 8 (25.0)        | 1 (3.1)         |
| Never-smoker            | 16 (21.6) | 4 (25.0)      | 4 (25.0)        | 0               |
| Missing                 | 1 (1.4)   | 0             | 0               | 0               |
| <i>p-value</i>          |           | .5553         | .7616           | >.9999          |
| <b>Tumor stage</b>      |           |               |                 |                 |
| IA                      | 27 (36.5) | 9 (33.3)      | 9 (33.3)        | 0               |
| IB                      | 5 (6.8)   | 2 (40.0)      | 2 (40.0)        | 0               |
| IIA                     | 4 (5.4)   | 1 (25.0)      | 1 (25.0)        | 0               |
| IIB                     | 16 (21.6) | 6 (37.5)      | 5 (31.3)        | 2 (12.5)        |
| IIIA                    | 11 (14.9) | 2 (18.2)      | 2 (18.2)        | 0               |
| IIIB                    | 6 (8.1)   | 1 (16.7)      | 1 (16.7)        | 0               |
| IIIC                    | 0         | 0             | 0               | 0               |
| IVA                     | 5 (6.8)   | 3 (60.0)      | 3 (60.0)        | 0               |
| <i>p-value</i>          |           | .5974         | .7858           | >.9999          |
| <b>Histology</b>        |           |               |                 |                 |
| Adenocarcinoma          | 55 (74.3) | 18 (32.7)     | 18 (32.7)       | 0               |
| Squamous cell carcinoma | 16(21.6)  | 5 (31.3)      | 4 (25.0)        | 2 (12.5)        |
| Other                   | 2 (2.7)   | 1 (50.0)      | 1 (50.0)        | 0               |
| Missing                 | 1 (1.4)   | 0             | 0               | 0               |
| <i>p-value</i>          |           | >.9999        | .7603           | .0483           |
| <b>Grading</b>          |           |               |                 |                 |
| G1                      | 4 (5.4)   | 2 (50.0)      | 2 (50.0)        | 0               |
| G2                      | 44 (59.5) | 14 (31.8)     | 14 (31.8)       | 1 (2.3)         |
| G3                      | 24 (32.4) | 8 (33.3)      | 7 (29.2)        | 1 (4.2)         |
| G4                      | 0         | 0             | 0               | 0               |
| Missing                 | 2 (2.7)   | 0             | 0               | 0               |
| <i>p-value</i>          |           | >.9999        | .7935           | >.9999          |

<sup>a</sup> current/former versus never-smokers

<sup>b</sup> stage I/II versus III/IV

<sup>c</sup> adenocarcinoma versus squamous cell carcinoma

<sup>d</sup> G1/G2 versus G3/G4

Abbreviations: hetCLU, heterotypic cluster; homCLU, homotypic CTC cluster

**Supplementary Table S2. Circulating tumor cell cluster (cCTC) status and NSCLC patients' characteristics (*continued*)**

|                                             | N (%)     | N cCTC+ve (%) | N hetCLU+ve (%) | N homCLU+ve (%) |
|---------------------------------------------|-----------|---------------|-----------------|-----------------|
| <b>Visceral pleura invasion</b>             |           |               |                 |                 |
| PL0                                         | 56 (75.7) | 16 (28.6)     | 15 (26.8)       | 2 (3.6)         |
| PL1                                         | 8 (10.8)  | 2 (25.0)      | 2 (25.0)        | 0               |
| PL2                                         | 5 (6.8)   | 3 (60.0)      | 3 (60.0)        | 0               |
| PL3                                         | 2 (2.7)   | 2 (100)       | 2 (100)         | 0               |
| Missing                                     | 3 (4.1)   | 1 (33.3)      | 1 (33.3)        | 0               |
| <i>p-value</i>                              |           | .2007         | .2075           | >.9999          |
| <b>Peritumoral neoplastic angi invasion</b> |           |               |                 |                 |
| Absent                                      | 66 (89.2) | 24 (36.4)     | 23 (34.8)       | 2 (3.0)         |
| Present                                     | 6 (8.1)   | 0             | 0               | 0               |
| Missing                                     | 2 (2.7)   | 0             | 0               | 0               |
| <i>p-value</i>                              |           | .1692         | .1674           | >.9999          |
| <b>Lymph-node status</b>                    |           |               |                 |                 |
| Negative                                    | 48 (64.9) | 17 (35.4)     | 16 (33.3)       | 1 (2.1)         |
| Positive                                    | 25 (33.8) | 7 (28.0)      | 7 (28.0)        | 1 (4.0)         |
| Missing                                     | 1 (1.4)   | 0             | 0               | 0               |
| <i>p-value</i>                              |           | .6055         | .7920           | >.9999          |

° PL0 vs PL1/PL2/PL3

Abbreviations: hetCLU, heterotypic cluster; homCLU, homotypic CTC cluster

**Supplementary Table S3. Recurrence-free survival probability in patients with operable stage I-II NSCLC according to standard clinico-pathological parameters and CTC status**

| Variable          | N cases | N recurrence events | Survival proportion (%) | HR 95% (CI)       | p-value |
|-------------------|---------|---------------------|-------------------------|-------------------|---------|
| pStage            |         |                     |                         |                   |         |
| I                 | 30      | 7                   | 70                      | 2.19 (0.65-7.36)  | .1452   |
| II                | 14      | 6                   | 51                      |                   |         |
| Grading           |         |                     |                         |                   |         |
| G1/G2             | 33      | 9                   | 70                      | 1.52 (0.41-5.57)  | .4820   |
| G3/G4             | 11      | 4                   | 51                      |                   |         |
| Lymph-node status |         |                     |                         |                   |         |
| Negative          | 38      | 11                  | 65                      | 1.47 (0.26-8.36)  | .1092   |
| Positive          | 6       | 2                   | 56                      |                   |         |
| CTC status        |         |                     |                         |                   |         |
| Negative          | 18      | 3                   | 82                      | 2.27 (0.75-6.86)  | .2003   |
| Positive          | 26      | 10                  | 55                      |                   |         |
| sCTC count        |         |                     |                         |                   |         |
| <2                | 36      | 7                   | 77                      | 5.15 (1.10-24.33) | .0009   |
| ≥2                | 8       | 6                   | 15                      |                   |         |
| sCTC count        |         |                     |                         |                   |         |
| <3                | 39      | 10                  | 69                      | 3.99 (0.47-33.57) | .0216   |
| ≥3                | 5       | 3                   | 27                      |                   |         |
| hetCLU status     |         |                     |                         |                   |         |
| Negative          | 29      | 7                   | 73                      | 1.42 (0.46-4.35)  | .5267   |
| Positive          | 15      | 6                   | 55                      |                   |         |

Abbreviations. “HR”, hazard ratio; “CI”, confidence interval; “CTC”, circulating tumor cell(s); “hetCLU”, heterotypic circulating tumor cell clusters.

**Supplementary Table S4. Recurrence-free survival probability in patients with operable stage III-IV NSCLC according to standard clinico-pathological parameters and CTC status**

| Variable             | N cases | N recurrence events | Survival proportion (%) | HR 95% (CI)       | p-value |
|----------------------|---------|---------------------|-------------------------|-------------------|---------|
| <b>pStage</b>        |         |                     |                         |                   |         |
| III                  | 13      | 8                   | 33                      |                   |         |
| IV                   | 5       | 5                   | 0                       | 2.78 (0.68-11.33) | .0537   |
| <b>Grading</b>       |         |                     |                         |                   |         |
| G1/G2                | 8       | 5                   | 38                      |                   |         |
| G3/G4                | 8       | 6                   | 18                      | 1.33 (0.41-4.35)  | .6261   |
| <b>CTC status</b>    |         |                     |                         |                   |         |
| Negative             | 6       | 3                   | 44                      |                   |         |
| Positive             | 12      | 10                  | 11                      | 3.12 (1.05-9.27)  | .0573   |
| <b>sCTC count</b>    |         |                     |                         |                   |         |
| <2                   | 12      | 9                   | 21                      |                   |         |
| ≥2                   | 6       | 4                   | 25                      | 1.10 (0.32-3.49)  | .9223   |
| <b>sCTC count</b>    |         |                     |                         |                   |         |
| <3                   | 15      | 11                  | 19                      |                   |         |
| ≥3                   | 3       | 2                   | 33                      | 0.73 (0.19-2.82)  | .6693   |
| <b>hetCLU status</b> |         |                     |                         |                   |         |
| Negative             | 13      | 8                   | 31                      |                   |         |
| Positive             | 5       | 5                   | 0                       | 3.44 (0.76-15.50) | .0129   |

Abbreviations. “HR”, hazard ratio; “CI”, confidence interval; “CTC”, circulating tumor cell(s); “hetCLU”, heterotypic circulating tumor cell clusters.

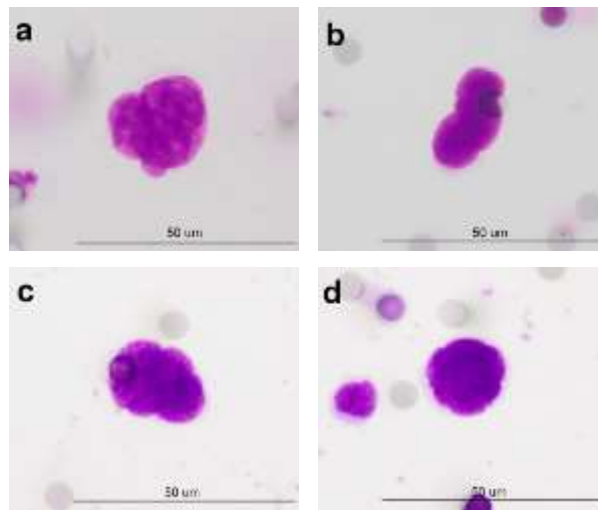

**Supplementary Figure S1. Naked nuclei detected in the blood of lung cancer-free individuals.** Images depict naked nuclei, i.e. without apparent cytoplasm, with the longer diameter  $>20\ \mu\text{m}$  and irregular border, sometimes (**a**, **c**) overlapped, (**b**) oblong or (**b**, **d**) hyperchromatic, on porous membranes stained with May-Grünwald Giemsa. Objective magnification 40x.



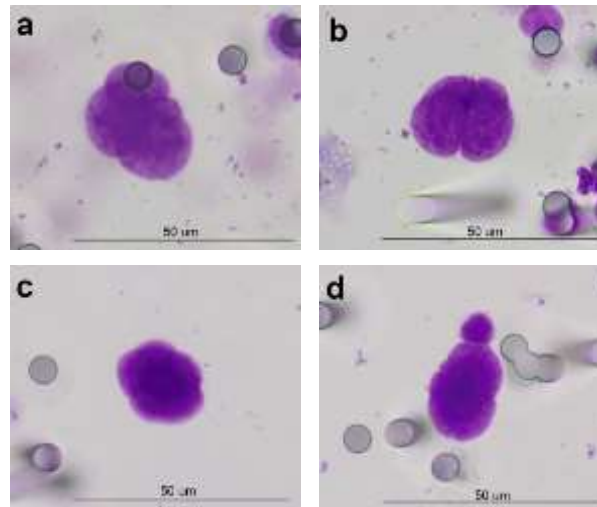

**Supplementary Figure S2. Naked nuclei detected in the blood of non-small cell lung cancer patients.** Images depict naked nuclei, i.e. without apparent cytoplasm, with the longer diameter  $>20\ \mu\text{m}$  and irregular border, sometimes (a) overlapped, (b) juxtaposed, (b-d) hyperchromatic, and (d) clustered with other smaller nuclei consistent with possible leukocytes, on porous membranes stained with May-Grünwald Giemsa. Objective magnification 40x.
